# Supplementary material for: Environmental arsenic exposure and DNA methylation of the tumor suppressor gene p16 and the DNA repair gene MLH1: effect of arsenic metabolism and genotype
Source: Royal Society of Chemistry journal article supplement (doi:10.1039/c2mt20120h), 2012-01-01
Supplement: c2mt20120h.pdf [file c2mt20120h.pdf]

Supplemental material for “**Environmental arsenic exposure and DNA methylation of the tumor suppressor gene *p16* and the DNA repair gene *MLH1*; effect of arsenic metabolism and genotype**”

Mohammad Bakhtiar Hossain, Marie Vahter, Gabriela Concha, Karin Broberg

Supplemental Table 1. Spearman's rank correlations for urinary arsenic concentration and different *p16* and *MLH1* methylation positions (N = 202)<sup>a</sup>

|                            | <i>p16</i> |        |        |        |        |        |        | <i>MLH1</i> |        |        |        |
|----------------------------|------------|--------|--------|--------|--------|--------|--------|-------------|--------|--------|--------|
|                            | P1         | P2     | P3     | P4     | P5     | P6     | P7     | P1          | P2     | P3     | P4     |
| Arsenic <sup>b</sup>       | 0.21**     | 0.19** | 0.17*  | 0.16*  | 0.19** | 0.20** | 0.16*  | 0.22**      | 0.17*  | 0.13   | 0.21** |
| <i>p16</i> P1 (position 1) |            | 0.82** | 0.81** | 0.83** | 0.82** | 0.79** | 0.76** | 0.44**      | 0.44** | 0.62** | 0.50** |
| <i>p16</i> P2              |            |        | 0.90** | 0.90** | 0.90** | 0.86** | 0.85** | 0.55**      | 0.52** | 0.73** | 0.55** |
| <i>p16</i> P3              |            |        |        | 0.89** | 0.85** | 0.80** | 0.79** | 0.56**      | 0.53** | 0.72** | 0.58** |
| <i>p16</i> P4              |            |        |        |        | 0.84** | 0.83** | 0.84** | 0.53**      | 0.55** | 0.71** | 0.59** |
| <i>p16</i> P5              |            |        |        |        |        | 0.85** | 0.82** | 0.60**      | 0.42** | 0.74** | 0.49** |
| <i>p16</i> P6              |            |        |        |        |        |        | 0.82** | 0.54**      | 0.50** | 0.73** | 0.47** |
| <i>p16</i> P7              |            |        |        |        |        |        |        | 0.57**      | 0.42** | 0.73** | 0.47** |
| <i>MLH1</i> P1             |            |        |        |        |        |        |        |             | 0.32** | 0.70** | 0.33** |
| <i>MLH1</i> P2             |            |        |        |        |        |        |        |             |        | 0.43** | 0.74** |
| <i>MLH1</i> P3             |            |        |        |        |        |        |        |             |        |        | 0.46** |

<sup>a</sup>\**P* <0.05; \*\**P* <0.01

<sup>b</sup>Urinary arsenic concentration adjusted to specific gravity (1.015 g/ml).

Supplemental Table 2: Associations between concentrations of urinary arsenic ( $\log_2$ -transformed) and fractions (%) of urinary arsenic metabolites and degree of *LINE1* methylation.

| Predictor             |                         | $\beta_1$ (95% CI)        | p-value |
|-----------------------|-------------------------|---------------------------|---------|
| Urinary arsenic       | Unadjusted <sup>a</sup> | 0.094 (-0.082 to 0.27)    | 0.30    |
|                       | Model 1                 | 0.12 (-0.059 to 0.30)     | 0.19    |
|                       | Model 2                 | 0.14 (-0.039 to 0.33)     | 0.12    |
| Inorganic arsenic (%) | Analysis 1 <sup>b</sup> | -0.0075 (-0.046 to 0.031) | 0.70    |
|                       | Analysis 2              | -0.016 (-0.055 to 0.022)  | 0.41    |
| MMA (%)               | Analysis 1              | 0.023 (-0.053 to 0.099)   | 0.56    |
|                       | Analysis 2              | 0.0088 (-0.068 to 0.086)  | 0.82    |
| DMA (%)               | Analysis 1              | 0.0012 (-0.031 to 0.033)  | 0.94    |
|                       | Analysis 2              | 0.010 (-0.023 to 0.043)   | 0.54    |

<sup>a</sup>Unadjusted model (N=202): Methylation (%) =  $\alpha_1 + \beta_1$  arsenic concentrations ( $\log_2$ -transformed); Model 1: model adjusted for age and coca chewing; Model 2: model with additional adjustments for cadmium in urine ( $\log_2$ -transformed) and selenium and zinc in blood.

<sup>b</sup>Analysis 1 (N=202): Methylation (%) =  $\alpha_1 + \beta_1$  fraction of arsenic metabolite +  $\beta_2$  arsenic concentrations ( $\log_2$ -transformed); Analysis 2: model adjusted for age and coca chewing.

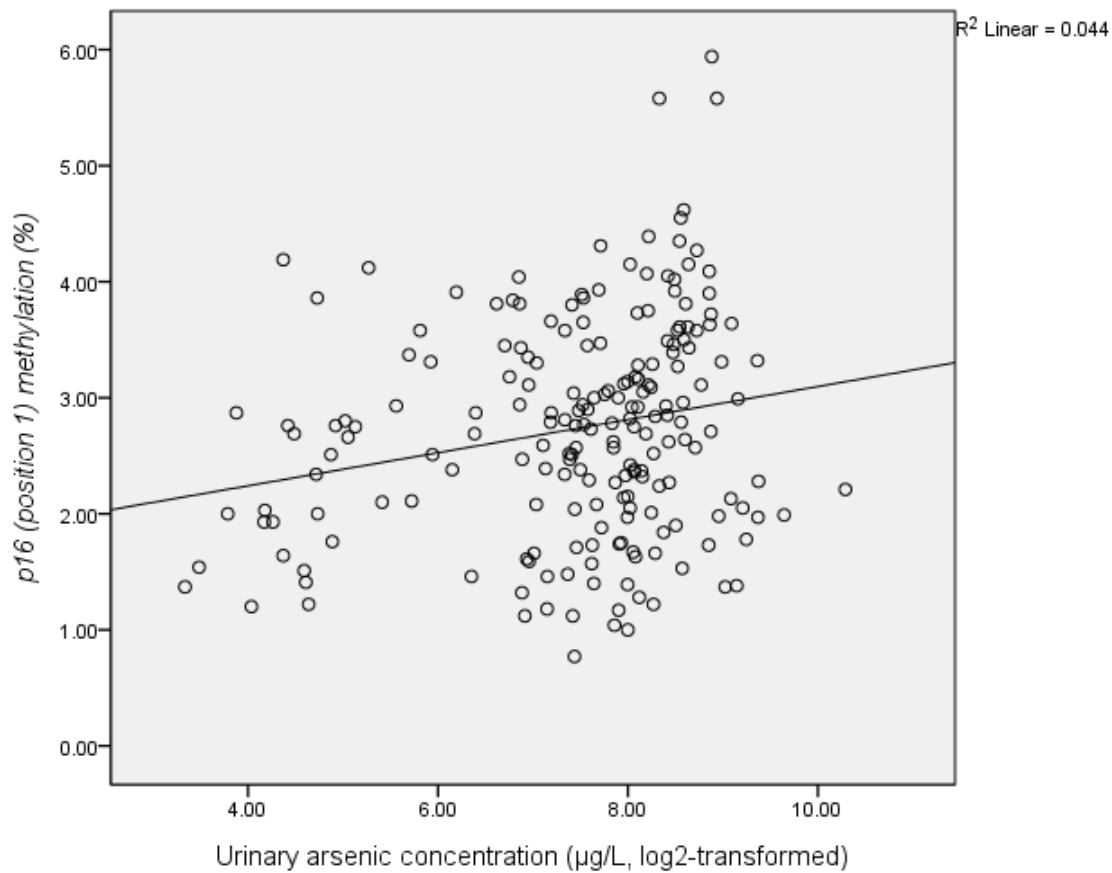

Supplemental Figure 1: Scatter plot of the association between the degree of *p16* methylation (%) and urinary arsenic concentration (µg/L, log<sub>2</sub>-transformed) ( $\beta = 0.14$ ;  $p = 0.0028$ ).

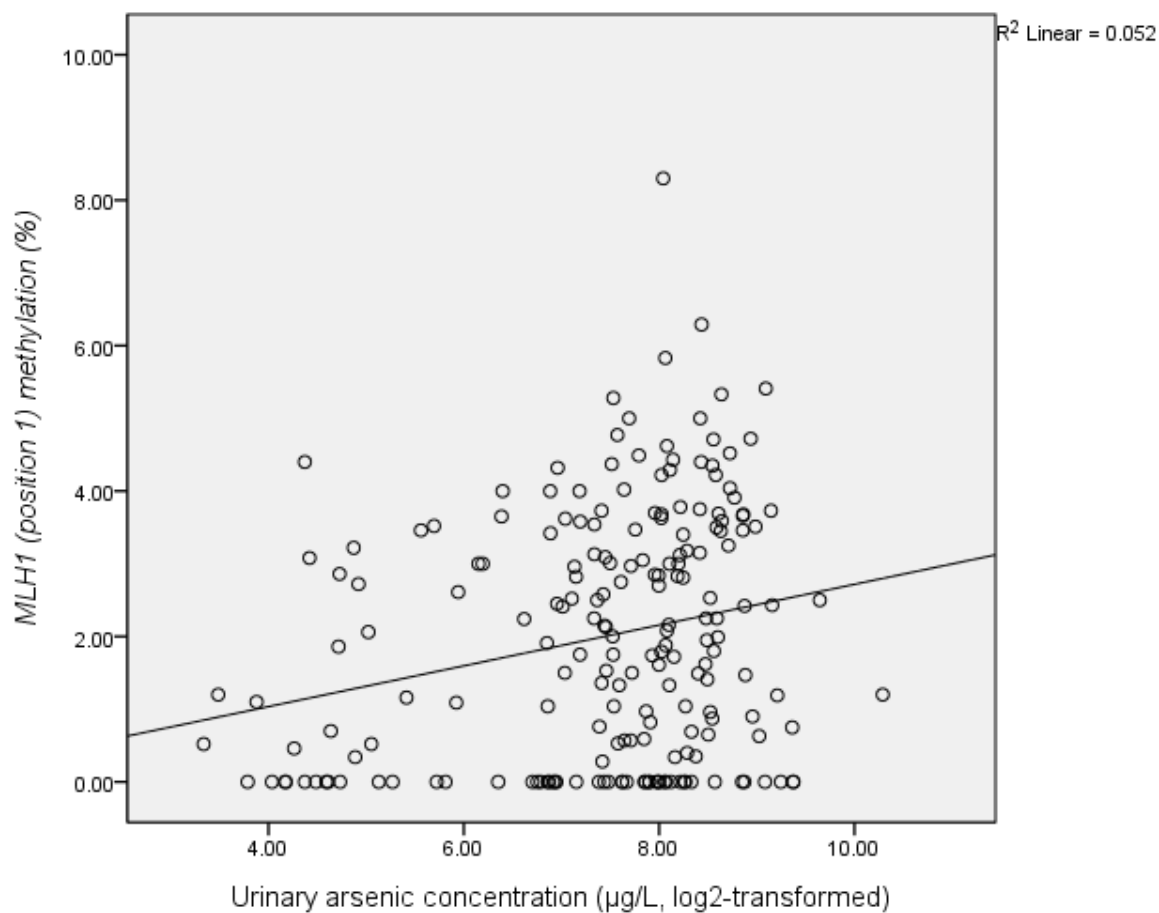

Supplemental Figure 2: Scatter plot of the association between the degree of *MLH1* methylation (%) and urinary arsenic concentration (µg/L, log<sub>2</sub>-transformed) ( $\beta = 0.28$ ;  $p = 0.0011$ ).
